# Supplementary material
Source: Springer Nature journal article supplement (https://www.springermedizin.de/resource/supplementary/12967_2013_1713_MOESM1_ESM.pdf/9575054)

A

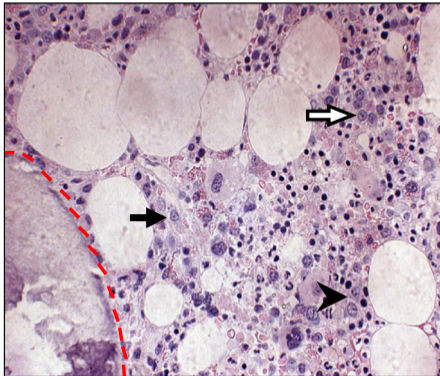

B

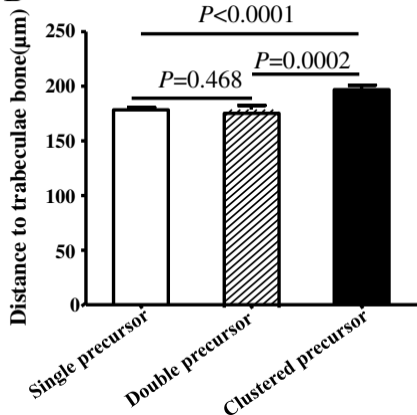

Supplement: MOESM1 [file 9575054]
